# Supplementary material for: Hydrological, chemical, and isotopic budgets of Lake Chad: a quantitative assessment of evaporation, transpiration and infiltration fluxes
Source: Copernicus journal article supplement (doi:10.5194/hess-20-1599-2016), 2016-04-26
Supplement: Supplementary file 1 [file hess-20-1599-2016-supplement.pdf]

Supplement of Hydrol. Earth Syst. Sci., 20, 1599–1619, 2016  
<http://www.hydrol-earth-syst-sci.net/20/1599/2016/>  
doi:10.5194/hess-20-1599-2016-supplement  
© Author(s) 2016. CC Attribution 3.0 License.

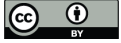

*Supplement of*

## **Hydrological, chemical, and isotopic budgets of Lake Chad: a quantitative assessment of evaporation, transpiration and infiltration fluxes**

**Camille Bouchez et al.**

*Correspondence to:* Camille Bouchez (bouchezcamille@gmail.com)

The copyright of individual parts of the supplement might differ from the CC-BY 3.0 licence.

| References                                                                      | Data                       | Localization                               | Monitored period     | Number of data                            | Lake state       | data processing                              | strategy of use in our study         |
|---------------------------------------------------------------------------------|----------------------------|--------------------------------------------|----------------------|-------------------------------------------|------------------|----------------------------------------------|--------------------------------------|
| LAKE CHAD (Fig.2)                                                               |                            |                                            |                      |                                           |                  |                                              |                                      |
| MODEL CALIBRATION AND VALIDATION                                                |                            |                                            |                      |                                           |                  |                                              |                                      |
| Bader et al., 2011                                                              | lake levels                | Southern pool, Northern pool, Archipelagos | 1956 - 2008          | 1132                                      | Normal and Small | unchanged                                    | calibration                          |
| Leblanc et al., 2011                                                            | surface estimations        | Northern Pool                              | 1986-2001            | 105                                       | Small            | unchanged                                    | calibration                          |
| Carmouze, 1976                                                                  | [Na+]                      | Southern pool - distributed                | 04/68-01/73          | 12                                        | Normal           | averaged for the Southern pool               | calibration                          |
| Chantraine and Lemoalle (1976a, 1976b, 1977), Carmouze, 1976, 1979              | [Na+]                      | Southern pool - distributed                | 10/73-03/77          | 23                                        | Transition       | averaged for the Southern pool and corrected | calibration                          |
| Chantraine and Lemoalle (1976a, 1976b, 1977), Chantraine (1978), Carmouze, 1976 | [Na+]                      | Northern pool - distributed                | 04/68-01/73          | 13                                        | Normal           | averaged for the Northern pool               | calibration                          |
| Chantraine and Lemoalle (1976a, 1976b, 1977), Chantraine (1978), Carmouze, 1976 | [Na+]                      | Northern pool - distributed                | 09/73-04/76          | 8                                         | Transition       | averaged for the Northern pool and corrected | calibration                          |
| Chantraine and Lemoalle (1976a, 1976b, 1977), Chantraine (1978)                 | [Na+]                      | Archipelagos - distributed                 | 04/68-01/73          | 12                                        | Normal           | averaged for the Archipelagos                | calibration                          |
| Chantraine and Lemoalle (1976a, 1976b, 1977), Chantraine (1978)                 | [Na+]                      | Archipelagos - distributed                 | 09/73-01/77          | 18                                        | Transition       | averaged for the Archipelagos and corrected  | calibration                          |
| This study                                                                      | [Na+]                      | Southern pool - localized                  | 2008-2011            | 15                                        | Small            | unchanged                                    | validation                           |
| Carmouze (1979)                                                                 | [Na+]                      | Northern pool - localized                  | 24-mai               | 2                                         | Normal           | unchanged                                    | validation                           |
| Chantraine and Lemoalle (1976a, 1976b, 1977), Chantraine (1978)                 | [Na+]                      | Northern pool - localized                  | 1974-1975            | 7                                         | Transition       | unchanged                                    | validation                           |
| Gauttier, 2004                                                                  | [Na+]                      | Northern pool - localized                  | 1999-2001            | 2                                         | Small            | unchanged                                    | validation                           |
| Zaini, 2008                                                                     | [Na+]                      | Northern pool - localized                  | 2003-2005            | 37                                        | Small            | unchanged                                    | validation                           |
| This study                                                                      | [Na+]                      | Northern pool - localized                  | 2008                 | 1                                         | Small            | unchanged                                    | validation                           |
| This study                                                                      | [Na+]                      | Archipelagos - localized                   | 2012                 | 8                                         | Small            | unchanged                                    | not used                             |
| Roche, 1980                                                                     | $\delta^{18}O$             | Southern pool - distributed                | 09/68-12/69          | 4                                         | Normal           | averaged for the Southern pool               | calibration                          |
| Roche, 1980                                                                     | $\delta^{18}O$             | Northern pool - distributed                | 09/68-12/69          | 4                                         | Normal           | averaged for the Northern pool               | calibration                          |
| Roche, 1980                                                                     | $\delta^{18}O$             | Archipelagos - distributed                 | 09/68-12/69          | 4                                         | Normal           | averaged for the Archipelagos                | calibration                          |
| Djoret, 2000                                                                    | $\delta^{18}O$             | Southern pool - localized                  | 1971                 | 2                                         | Transition       | localized                                    | validation                           |
| This study                                                                      | $\delta^{18}O / \delta^2H$ | Southern pool - localized                  | 2008-2011            | 13                                        | Small            | localized                                    | validation                           |
| Djoret, 2000                                                                    | $\delta^{18}O$             | Northern pool - localized                  | 1971                 | 10                                        | Transition       | localized                                    | validation                           |
| Gauttier, 2004                                                                  | $\delta^{18}O / \delta^2H$ | Northern pool - localized                  | 1999-2001            | 2                                         | Small            | localized                                    | validation                           |
| This study                                                                      | $\delta^{18}O / \delta^2H$ | Northern pool - localized                  | 2008                 | 1                                         | Small            | localized                                    | validation                           |
| Djoret, 2000                                                                    | $\delta^{18}O$             | Archipelagos - localized                   | 1971                 | 1                                         | Transition       | localized                                    | validation                           |
| RIVERS (Fig.3)                                                                  |                            |                                            |                      |                                           |                  |                                              |                                      |
| MODEL INPUT VARIABLE                                                            |                            |                                            |                      |                                           |                  |                                              |                                      |
| Bader et al., 2011                                                              | daily discharge            | Chari-Logone and KY                        | 1956-2011            | reconstructed data on all the time period |                  | unchanged                                    |                                      |
| Carmouze, 1976                                                                  | [Na+]                      | Chari-Logone                               | 1976                 | 12                                        | }                | monthly averages >> 1-year monthly scenario  | spline interpolation to daily values |
| Roche, 1969                                                                     | [Na+]                      | Chari-Logone                               | 1969                 | 12                                        |                  |                                              |                                      |
| Olivry, 1996                                                                    | [Na+]                      | Chari-Logone                               | mean                 | 12                                        |                  |                                              |                                      |
| Djoret, 2000                                                                    | [Na+]                      | Chari-Logone                               | 1995-1996            | 6                                         |                  |                                              |                                      |
| Zaini, 2008                                                                     | [Na+]                      | Chari-Logone                               | 2006-2009            | 5                                         |                  |                                              |                                      |
| This study                                                                      | [Na+]                      | Chari-Logone                               | 2008-2011            | 12                                        |                  |                                              |                                      |
| Roche, 1969                                                                     | [Na+]                      | Komadougou-Yobé                            | 1970                 | 10                                        | }                | monthly averages >> 1-year monthly scenario  | spline interpolation to daily values |
| Gauttier, 2004                                                                  | [Na+]                      | Komadougou-Yobé                            | 2001-2002            | 34                                        |                  |                                              |                                      |
| Zaini, 2008                                                                     | [Na+]                      | Komadougou-Yobé                            | 2007-2008            | 12                                        |                  |                                              |                                      |
| This study                                                                      | [Na+]                      | Komadougou-Yobé                            | 2008                 | 1                                         |                  |                                              |                                      |
| Fontes, 1970a                                                                   | $\delta^{18}O$             | Chari-Logone                               | 1967-1969            | 56                                        | }                | monthly averages >> 1-year monthly scenario  | spline interpolation to daily values |
| Djoret, 2000                                                                    | $\delta^{18}O / \delta^2H$ | Chari-Logone                               | 1971-1973 et         | 46/10                                     |                  |                                              |                                      |
| This study                                                                      | $\delta^{18}O / \delta^2H$ | Chari-Logone                               | 2008-2012            | 07-janv                                   |                  |                                              |                                      |
| Gauttier, 2004                                                                  | $\delta^{18}O / \delta^2H$ | Komadougou-Yobé                            | 2001-2002            | 21/21                                     | }                | monthly averages >> 1-year monthly scenario  | spline interpolation to daily values |
| This study                                                                      | $\delta^{18}O / \delta^2H$ | Komadougou-Yobé                            | 2008                 | 1                                         |                  |                                              |                                      |
| RAINFALL (Fig.4)                                                                |                            |                                            |                      |                                           |                  |                                              |                                      |
| MODEL INPUT VARIABLE                                                            |                            |                                            |                      |                                           |                  |                                              |                                      |
| Bader et al., 2011                                                              | daily rainfall rates       | Southern Pool, Northern Pool, Archipelagos | 1956-2011            | reconstructed data                        |                  | unchanged                                    |                                      |
| Roche, 1980                                                                     | monthly [Na+]              | N'Djaména                                  | 1969                 | 12                                        |                  | 1-year monthly scenario                      | spline interpolation to daily values |
| GNIP, IAEA                                                                      | $\delta^{18}O$             | N'Djaména                                  | 1964-1995            | 86                                        |                  | interannual monthly values reconstructed     | spline interpolation to daily values |
| GNIP, IAEA                                                                      | $\delta^2H$                | N'Djaména                                  | 1964-1995            | 74                                        |                  | interannual monthly values reconstructed     | spline interpolation to daily values |
| ATMOSPHERIC VAPOR (Fig.4)                                                       |                            |                                            |                      |                                           |                  |                                              |                                      |
| MODEL INPUT VARIABLE                                                            |                            |                                            |                      |                                           |                  |                                              |                                      |
| Tremoy et al., 2012                                                             | delta 180                  | Niamey                                     | June 2010 - May 2011 | hourly and daily measurements             |                  | 1-year monthly scenario                      | spline interpolation to daily values |
| CLIMATIC VARIABLES                                                              |                            |                                            |                      |                                           |                  |                                              |                                      |
| MODEL INPUT VARIABLE                                                            |                            |                                            |                      |                                           |                  |                                              |                                      |
| Harris et al., 2014, CRU                                                        | Temperature                | Southern Pool, Northern Pool, Archipelagos | 1956-2011            | monthly                                   |                  | interannual monthly values                   | spline interpolation to daily values |
| Harris et al., 2014, CRU                                                        | Relative Humidity          | Southern Pool, Northern Pool, Archipelagos | 1956-2011            | monthly                                   |                  | interannual monthly values                   | spline interpolation to daily values |

**Table 1.** Details on the data set from the literature used in this study.

**Table 2.** Details on the new data set provided in this study

| Location                 | Date of sampling | [Na <sup>+</sup> ] (mmol.L <sup>-1</sup> ) | δ <sup>18</sup> O (‰) | δ <sup>2</sup> H (‰) |
|--------------------------|------------------|--------------------------------------------|-----------------------|----------------------|
| Lake Chad, Archipels     | 04/08/12         | 0,75                                       |                       |                      |
| Lake Chad, Archipels     | 04/08/12         | 0,70                                       |                       |                      |
| Lake Chad, Archipels     | 04/08/12         | 0,61                                       |                       |                      |
| Lake Chad, Archipels     | 04/08/12         | 0,72                                       |                       |                      |
| Lake Chad, Archipels     | 05/08/12         | 1,71                                       |                       |                      |
| Lake Chad, Archipels     | 06/08/12         | 0,74                                       |                       |                      |
| Lake Chad, Archipels     | 06/08/12         | 0,87                                       |                       |                      |
| Lake Chad, Southern pool | 17/10/08         | 0,14                                       | -3,38                 | -26,6                |
| Lake Chad, Southern pool | 02/11/10         | 0,13                                       | -2,67                 | -15,9                |
| Lake Chad, Southern pool | 03/11/10         | 0,14                                       | -2,63                 | -16,8                |
| Lake Chad, Southern pool | 03/11/10         | 0,14                                       | -2,71                 | -17,2                |
| Lake Chad, Southern pool | 03/11/10         | 0,15                                       | -2,68                 | -17,3                |
| Lake Chad, Southern pool | 02/12/11         | 0,15                                       |                       |                      |
| Lake Chad, Southern pool | 03/12/11         | 0,16                                       | -1,61                 | -9                   |
| Lake Chad, Southern pool | 04/12/11         | 0,15                                       | -1,6                  | -9,7                 |
| Lake Chad, Southern pool | 06/12/11         | 0,15                                       | -1,53                 | -9,7                 |
| Lake Chad, Southern pool | 07/12/11         | 0,15                                       | -1,38                 | -9,1                 |
| Lake Chad, Southern pool | 07/12/11         | 0,15                                       | -1,53                 | -9,2                 |
| Lake Chad, Southern pool | 09/12/11         | 0,16                                       | -1,42                 | -8,3                 |
| Lake Chad, Southern pool | 09/12/11         | 0,15                                       | -1,58                 | -8,2                 |
| Lake Chad, Southern pool | 10/12/11         | 0,15                                       | -1,44                 | -9                   |
| Lake Chad, Southern pool | 11/12/11         | 0,21                                       |                       |                      |
| Lake Chad, Northern pool | 11/10/08         | 0,88                                       | 9,93                  | 38,60                |
| Chari-Logone             | 19/10/08         | 0,13                                       | -3,03                 | -20,7                |
| Chari-Logone             | 19/11/11         | 0,11                                       | -2,18                 |                      |
| Chari-Logone             | 19/11/11         | 0,15                                       |                       |                      |
| Chari-Logone             | 20/11/11         | 0,14                                       | -2,77                 |                      |
| Chari-Logone             | 20/11/11         | 0,09                                       | -3,26                 |                      |
| Chari-Logone             | 20/11/11         | 0,14                                       |                       |                      |
| Chari-Logone             | 21/11/11         | 0,19                                       | -2,62                 |                      |
| Chari-Logone             | 27/11/11         | 0,14                                       | -2,58                 |                      |
| Chari-Logone             | 01/12/11         | 0,15                                       | -1,61                 |                      |
| Chari-Logone             | 22/07/12         | 0,13                                       |                       |                      |
| Chari-Logone             | 05/12/12         | 0,19                                       |                       |                      |
| Chari-Logone             | 04/12/12         | 0,15                                       |                       |                      |
| Komadougou-Yobe          | 12/10/08         | 0,21                                       | -3,44                 | -25,8                |

**Metropolis algorithm steps**

This algorithm can be summarized by the following steps :

1. A parameter set is defined by the value of the likelihood function :

$$L(m_i) = k \cdot \exp\left(\frac{-S(\mathbf{m}_i)}{li^2}\right) \quad (1)$$

where where  $k$  is an appropriate normalization constant and  $li$  refers to the total noise variance.

2. At the inversion stage  $i+1$ , from a parameter set  $\mathbf{m}_i$ , a new parameter set  $\mathbf{m}_{i+1}$  is randomly created by a perturbation of  $\mathbf{m}_i$  within the a priori probability density function. The coefficient of perturbation corresponds to the local exploration of the neighborhood of the current value

10 of the Markov Chain process. It is chosen as 1/30 of the total range of a priori PDF to ensure exploration of all the parameter space.

3. The direct problem is solved using the model and the parameter set  $\mathbf{m}_{i+1}$  and the new misfit  $S(\mathbf{m}_{i+1})$  is calculated. The probability to accept the displacement from  $\mathbf{m}_i$  to  $\mathbf{m}_{i+1}$  is calculated using:

$$15 \quad p = 1 \quad \text{if } S(\mathbf{m}_{i+1}) < S(\mathbf{m}_i) \quad (2)$$

$$p = \exp\left(\frac{-(S(\mathbf{m}_{i+1}) - S(\mathbf{m}_i))}{li^2}\right) \quad \text{if } S(\mathbf{m}_{i+1}) > S(\mathbf{m}_i) \quad (3)$$

20 In the second unfavorable case, in practice, a number  $n$  is sorted in a uniform distribution between 0 and 1. If  $n$  is lower than the  $p$  value in Eq. 3, which has the probability  $p$  of occurring, then the unfavorable displacement to  $\mathbf{m}_{i+1}$  is accepted. The probability to accept a displacement that increases the error between the model and the data is designed to leave local minima of the misfit function (Eq. 8 in the paper). The  $li$  value influences the probability to accept an unfavorable case and must be chosen as a trade-off between avoidance of local minima and divergence of the misfit function. Several values of  $li$  were tested and a value of 0.03 was used.

4. Those steps are repeated until convergence is reached.
- 25 5. At the end, this method yields many parameter sets that were used during the walk. Only those that match a convergence criteria are kept (Fig. 1). The values of the parameters kept are analyzed to obtain the marginal *a posteriori* PDF of each parameter.

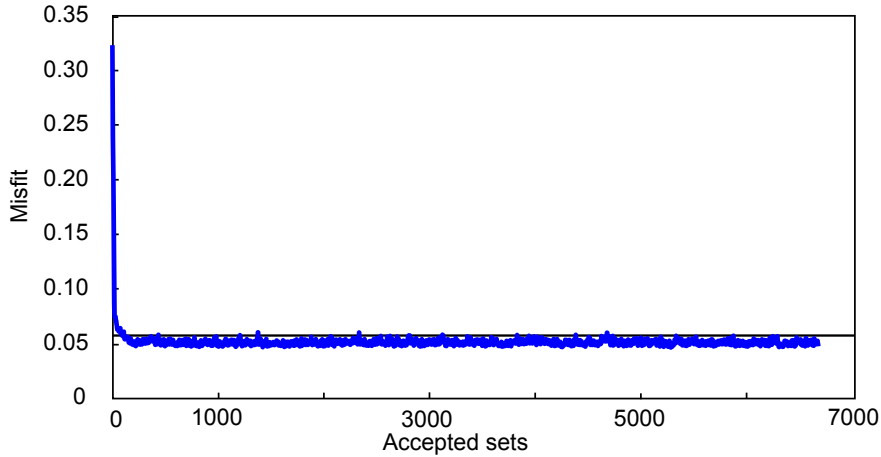

**Figure 1.** Representation of the misfit function as a function of the accepted samples during the Metropolis random walk algorithm.
